# Supplementary material for: Modulating D-amino acid oxidase (DAAO) substrate specificity through facilitated solvent access
Source: PLOS journal article supplement (doi:10.1371/journal.pone.0198990), 2018-06-15
Supplement: S1 (10.1371/journal.pone.0198990.s001) [file journal.pone.0198990.s001]

| S. No | Origin | Location                                                           | Modification                                                                                                          | Sequence               |
|-------|--------|--------------------------------------------------------------------|-----------------------------------------------------------------------------------------------------------------------|------------------------|
| 1     | pkDAAO | First and Second Shell                                             | Alanine mutation                                                                                                      | L51A                   |
| 2     | pkDAAO | First and Second Shell                                             | Alanine mutation                                                                                                      | Q53A                   |
| 3     | pkDAAO | First and Second Shell                                             | Alanine mutation                                                                                                      | P54A                   |
| 4     | pkDAAO | First and Second Shell                                             | Alanine mutation                                                                                                      | Y55A                   |
| 5     | pkDAAO | First and Second Shell                                             | Alanine mutation                                                                                                      | T56A                   |
| 6     | pkDAAO | First and Second Shell                                             | Alanine mutation                                                                                                      | N96A                   |
| 7     | pkDAAO | First and Second Shell                                             | Alanine mutation                                                                                                      | N134A                  |
| 8     | pkDAAO | First and Second Shell                                             | Alanine mutation                                                                                                      | I215A                  |
| 9     | pkDAAO | First and Second Shell                                             | Alanine mutation                                                                                                      | H217A                  |
| 10    | pkDAAO | First and Second Shell                                             | Alanine mutation                                                                                                      | Y224A                  |
| 11    | pkDAAO | First and Second Shell                                             | Alanine mutation                                                                                                      | Y228A                  |
| 12    | pkDAAO | First and Second Shell                                             | Alanine mutation                                                                                                      | I230A                  |
| 13    | pkDAAO | First and Second Shell                                             | Alanine mutation                                                                                                      | F242A                  |
| 14    | pkDAAO | First and Second Shell                                             | Alanine mutation                                                                                                      | R283A                  |
| 15    | pkDAAO | First and Second Shell                                             | Alanine mutation                                                                                                      | G313A                  |
| 16    | pkDAAO | Wild type                                                          | Nil                                                                                                                   | Y55                    |
| 17    | pkDAAO | Y55                                                                | Mutated to C                                                                                                          | Y55C                   |
| 18    | pkDAAO | Y55                                                                | Mutated to D                                                                                                          | Y55D                   |
| 19    | pkDAAO | Y55                                                                | Mutated to E                                                                                                          | Y55E                   |
| 20    | pkDAAO | Y55                                                                | Mutated to F                                                                                                          | Y55F                   |
| 21    | pkDAAO | Y55                                                                | Mutated to G                                                                                                          | Y55G                   |
| 22    | pkDAAO | Y55                                                                | Mutated to H                                                                                                          | Y55H                   |
| 23    | pkDAAO | Y55                                                                | Mutated to I                                                                                                          | Y55I                   |
| 24    | pkDAAO | Y55                                                                | Mutated to K                                                                                                          | Y55K                   |
| 25    | pkDAAO | Y55                                                                | Mutated to L                                                                                                          | Y55L                   |
| 26    | pkDAAO | Y55                                                                | Mutated to M                                                                                                          | Y55M                   |
| 27    | pkDAAO | Y55                                                                | Mutated to N                                                                                                          | Y55N                   |
| 28    | pkDAAO | Y55                                                                | Mutated to P                                                                                                          | Y55P                   |
| 29    | pkDAAO | Y55                                                                | Mutated to Q                                                                                                          | Y55Q                   |
| 30    | pkDAAO | Y55                                                                | Mutated to R                                                                                                          | Y55R                   |
| 31    | pkDAAO | Y55                                                                | Mutated to S                                                                                                          | Y55S                   |
| 32    | pkDAAO | Y55                                                                | Mutated to T                                                                                                          | Y55T                   |
| 33    | pkDAAO | Y55                                                                | Mutated to V                                                                                                          | Y55V                   |
| 34    | pkDAAO | Y55                                                                | Mutated to W                                                                                                          | Y55W                   |
| 35    | pkDAAO | Active site 'lid' loop residues 223-225 ( I223-Y224-N235)          | Glycine mutations to lid loop residues                                                                                | I223G-Y224G-N235G      |
| 36    | pkDAAO | Active site 'lid' loop residues 223-225 ( I223-Y224-N235), and Y55 | Y55A in combination with glycine mutations to the lid loop residues                                                   | Y55A-I223G-Y224G-N235G |
| 37    | pkDAAO | Active site 'lid' loop residues I223-Y224, and Y55                 | Alanine mutation of the I223 residue                                                                                  | I223A                  |
| 38    | pkDAAO | Active site 'lid' loop residues I223-Y224, and Y55                 | Alanine mutations of I223 - Y224, and their combinations with Y55A mutation                                           | Y55A-I223A             |
| 39    | pkDAAO | Active site 'lid' loop residues I223-Y224, and Y55                 | Alanine mutations of I223 - Y224, and their combinations with Y55A mutation                                           | Y55A-Y224A             |
| 40    | pkDAAO | Active site 'lid' loop residues I223-Y224, and Y55                 | Alanine mutations of I223 and Y224                                                                                    | I223A-Y224A            |
| 41    | pkDAAO | Active site 'lid' loop residues I223-Y224, and Y55                 | Alanine mutations of I223 - Y224, and their combinations with Y55A mutation                                           | Y55A/I223A/Y224A       |
| 42    | pkDAAO | Active site 'lid' loop deletion                                    | 'Lid' loop residues R221 and N225 joined (by deleting G222-I223-Y224 residues)                                        | R221-N225              |
| 43    | pkDAAO | Active site 'lid' loop deletion, and Y55                           | 'Lid' loop residues R221 and N225 joined (by deleting G222-I223-Y224 residues), in combination with the Y55A mutation | Y55A--R221-N225        |
| 44    | hDAAO  | Active site 'lid' loop deletion                                    | 'Lid' loop residues R221 and N225 joined (by deleting G222-I223-Y224 residues)                                        | R221-N225              |
| 45    | hDAAO  | Active site 'lid' loop deletion, and Y55                           | 'Lid' loop residues R221 and N225 joined (by deleting G222-I223-Y224 residues), in combination with the Y55A mutation | Y55A--R221-N225        |
| 46    | hDAAO  | Wild type                                                          | Nil                                                                                                                   | Y55                    |
| 47    | hDAAO  | Y55 position                                                       | Mutated to A                                                                                                          | Y55A                   |
| 48    | hDAAO  | Y55 position                                                       | Mutated to W                                                                                                          | Y55W                   |
| 49    | pkDAAO | Y55 position and T56                                               | Y55 mutated to A and T56 to L                                                                                         | Y55A-T56L              |
| 50    | pkDAAO | Y55 position and T56                                               | Y55 mutated to W and T56 to L                                                                                         | Y55W-T56L              |
| 51    | hDAAO  | Y55 position and L56                                               | Y55 mutated to A and L56 to T                                                                                         | Y55A-L56T              |
| 52    | hDAAO  | Y55 position and L56                                               | Y55 mutated to W and L56 to T                                                                                         | Y55W-L56T              |
